# Supplementary material for: Low-coordinated Pd metallene promotes the electrochemical reduction of nitrite to ammonia
Source: Royal Society of Chemistry journal article supplement (doi:10.1039/d4nj00098f), 2024-01-01
Supplement: d4nj00098f1.pdf [file d4nj00098f1.pdf]

# Supporting Information

## Low-coordinated Pd metallene promotes electrochemical reduction of nitrite to ammonia

*Wenhuan Qu*<sup>a\*</sup>, *Tingting Wu*<sup>a</sup>, *Jingxuan Wang*<sup>a</sup>, *Xiaoxu Liu*<sup>a</sup>, *Ye Tian*<sup>a</sup>, *Ke Chu*<sup>b\*</sup>  
<sup>a</sup> College of Science, Hebei North University, Zhangjiakou 075000, Hebei, China  
<sup>b</sup> School of Materials Science and Engineering, Lanzhou Jiaotong University, Lanzhou 730070, China  
\*Corresponding author. [qwenhuan2023@163.com](mailto:qwenhuan2023@163.com) (W.H. Qu), [chuk630@mail.lzjtu.cn](mailto:chuk630@mail.lzjtu.cn) (K. Chu)

## Experimental Section

### Synthesis of L-Pd

All the reagents were of analytical grade and were used as received without further purification. To prepare Pd metallene, 0.25 g of trioctylphosphine oxide and 20 mg of Pd(acac)<sub>2</sub> were dissolved in octanoic acid (OA) and kept at 60 °C in an oil bath. The mixed solution was then added with 5 mL of DMF and 20 mg of Mo(CO)<sub>6</sub> and kept for 1 h. The precipitates were collected via centrifugation, thoroughly rinsed with deionized water and dried overnight. The obtained Pd metallene was further subjected to Ar plasma treatment for 5 min in an AX-1000 plasma system (13.56 MHz) to obtain low-coordinated Pd metallene (L-Pd).

### Electrochemical experiments and characterizations

Electrochemical measurements were carried out using a CHI-760E electrochemical workstation employing a three-electrode cell system consisting of a working electrode, an Ag/AgCl reference electrode and a Pt foil counter electrode. The working electrode is L-Pd catalyst loaded on pretreated carbon cloth (CC). The CC (1 × 1 cm<sup>2</sup>) was pretreated by soaking it in 0.5 M H<sub>2</sub>SO<sub>4</sub> for 12 h, and then washed with deionized water several times and dried at 60 °C for 24 h. The working electrode was prepared by coating 20 μL of the catalyst ink onto the pretreated CC and dried in the air. The catalyst ink was fabricated by ultrasonically dispersing 1 mg of the catalyst in 100 μL of ethyl alcohol containing 5 μL of Nafion (5 wt%). All the potentials were referenced to a reversible hydrogen electrode (RHE) by the following equation:  $E \text{ (V vs. RHE)} = E \text{ (V vs. Ag/AgCl)} + 0.198 \text{ V} + 0.059 \times \text{pH}$ . Electrochemical NO<sub>2</sub>RR measurements were conducted in an H-type electrochemical cell containing 0.5 M Na<sub>2</sub>SO<sub>4</sub> with 0.1 M NaNO<sub>2</sub> separated by Nafion 211 membrane. Prior to use, the Nafion membrane was pretreated by heating it in a 5% H<sub>2</sub>O<sub>2</sub> aqueous solution at 80 °C for 1 h, followed by rinsing with deionized water at 80 °C for another 1 h. After each chronoamperometry test for 0.5 h electrolysis at a specific potential, the liquid products were analyzed using colorimetric methods with UV-vis absorbance spectrophotometer (MAPADA P5), while the gas products were analyzed

using gas chromatography (Shimadzu GC2010). Transmission electron microscopy (TEM) was conducted on a Tecnai G<sup>2</sup> F20 microscope. X-ray diffraction (XRD) was carried out on a Rigaku D/max 2400 diffractometer. Atom force microscopy (AFM) was performed on a Nanoscope-IIIa scanning probe microscope.

### Determination of NH<sub>3</sub>

The NH<sub>3</sub> concentration in the electrolyte was determined using the indophenol blue method[1]. The electrolyte was collected and appropriately diluted to ensure it fell within the detection range. In a typical colorimetric assay, 2 mL of the diluted electrolyte obtained after electrolysis were mixed with 1 mL of NaClO solution (4.5%), 2 mL of 1 M NaOH solution (containing 5% C<sub>7</sub>H<sub>6</sub>O<sub>3</sub> and 5% C<sub>6</sub>H<sub>5</sub>Na<sub>3</sub>O<sub>7</sub>·2H<sub>2</sub>O), and 0.2 mL of a mixed solution (prepared by diluting 1 g Na<sub>2</sub>Fe(CN)<sub>5</sub>NO·2H<sub>2</sub>O to 100 mL using ultrapure water). The mixture was allowed to stand for 2 h, after which UV-vis absorption spectra were measured. The concentration-absorbance curves were calibrated using a standard NH<sub>4</sub>Cl solution with various concentrations. The NH<sub>3</sub> yield rate and FE<sub>NH<sub>3</sub></sub> (Faradaic efficiency of NH<sub>3</sub> production) were calculated using the following equation:

NH<sub>3</sub> yield was calculated by

$$\text{NH}_3 \text{ yield } (\mu\text{g h}^{-1} \text{ cm}^{-2}) = \frac{c_{\text{NH}_3} \times V}{t \times A} \quad (1)$$

FE<sub>NH<sub>3</sub></sub> was calculated by

$$\text{FE}_{\text{NH}_3} (\%) = \frac{6 \times F \times c_{\text{NH}_3} \times V}{M \times Q} \times 100\% \quad (2)$$

where  $c_{\text{NH}_3}$  ( $\mu\text{g mL}^{-1}$ ) is the measured NH<sub>3</sub> concentration,  $V$  (mL) is the volume of the electrolyte,  $t$  (h) is the reduction time and  $A$  ( $\text{cm}^{-2}$ ) is the area loading of the catalyst on CC.  $F$  ( $96500 \text{ C mol}^{-1}$ ) is the Faraday constant,  $M$  is the relative molecular mass of NH<sub>3</sub>,  $Q$  is the quantity of applied electricity.

### Calculation details

Density functional theory (DFT) calculations were conducted using a Cambridge sequential total energy package (CASTEP). The method of the Perdew-Burke-Ernzerhof (PBE) generalized gradient approximation (GGA) functional was utilized

for the exchange-correlation potential. The DFT-D correction method was used to describe the van der Waals interactions. A cutoff energy of 450 eV was chosen and the  $3 \times 3 \times 1$  Monkhorst-Pack mesh was used in Brillouin zone sampling. Energy and force will not reach convergence until lower to  $1.0 \times 10^{-5}$  eV and  $0.02$  eV/Å, respectively. Pd (111) was modeled by a  $4 \times 4$  supercell, and a vacuum region of  $15$  Å was used to separate adjacent slabs.

The computational hydrogen electrode (CHE) model was adopted to calculate the Gibbs free energy change ( $\Delta G$ ) for each elementary step as follows<sup>[3]</sup>:

$$\Delta G = \Delta E + \Delta E_{ZPE} - T\Delta S \quad (3)$$

where  $\Delta E$  is the adsorption energy,  $\Delta E_{ZPE}$  is the zero-point energy difference and  $T\Delta S$  is the entropy difference between the gas phase and adsorbed state. The entropies of free gases were acquired from the NIST database.

MD simulations were performed using a force field type of Universal. The electrolyte system was modeled by a cubic cell with placing catalyst at the center of the cell and randomly filling 1000 H<sub>2</sub>O, 50 NO<sub>2</sub><sup>-</sup> molecules, and 50 H atoms. After geometry optimization, the MD simulations were performed in an NVT ensemble (298 K) with the total simulation time of 5 ns at a time step of 1 fs.

The radial distribution function (RDF) is calculated by<sup>[3]</sup>:

$$g(r) = \frac{dN}{4\pi\rho r^2 dr} \quad (4)$$

where  $dN$  is the amount of NO<sub>2</sub><sup>-</sup> in the shell between the central particle  $r$  and  $r+dr$ ,  $\rho$  is the number density of NO<sub>2</sub><sup>-</sup>, H<sub>2</sub>O, and H.

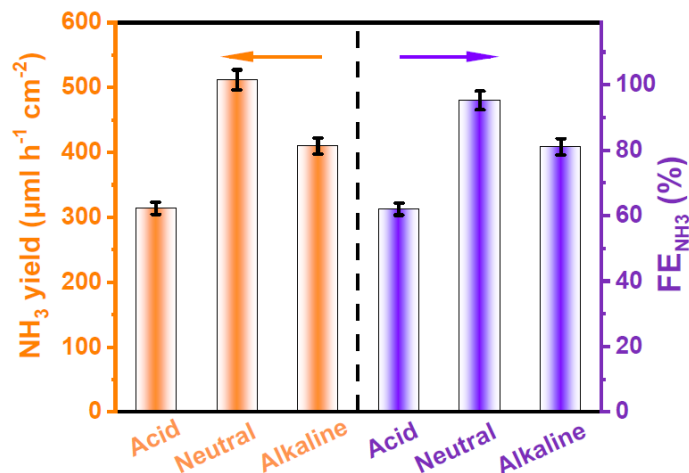

Fig. S1. Comparison of the NO<sub>2</sub>RR performances of L-Pd in acidic, neutral, and alkaline electrolytes at -0.6 V.

It is shown that L-Pd shows a significantly enhanced NO<sub>2</sub>RR activity in neutral electrolyte compared to that in acidic and basic electrolytes, demonstrating the superiority of neutral electrolyte in facilitating the high NO<sub>2</sub>RR performance. The reduced performance in acidic and basic electrolytes is attributed to the fact that in acid electrolyte, the competing HER would be enhanced and can largely suppress the NO<sub>2</sub>RR, while in alkaline electrolyte, the available protons are too limited to provide the sufficient proton source for hydrogenating nitrogen species during the NO<sub>2</sub>RR electrolysis, because NO<sub>2</sub><sup>-</sup>-to-NH<sub>3</sub> conversion is known to be a hydrogenation process.

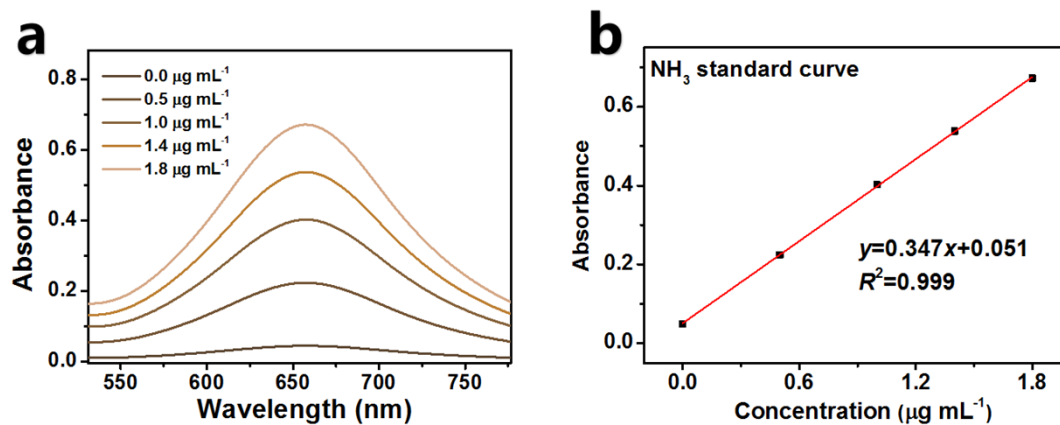

Fig. S2. (a) UV-vis absorption spectra of  $\text{NH}_4^+$  assays after incubated for 2 h at ambient conditions. (b) Calibration curve used for the calculation of  $\text{NH}_3$  concentrations.

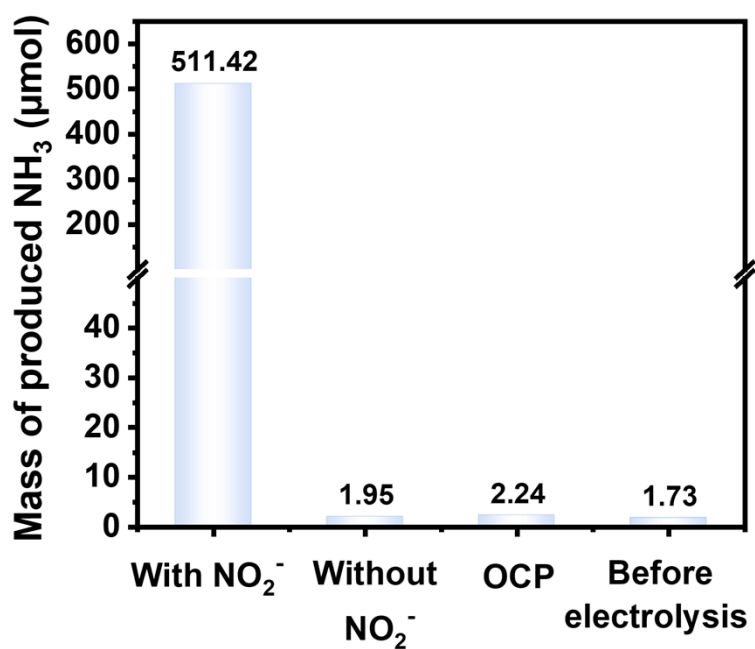

Fig. S3. Amounts of produced NH<sub>3</sub> on L-Pd under different conditions: (1) electrolysis in NO<sub>2</sub><sup>-</sup>-containing solution at -0.8 V, (2) electrolysis in NO<sub>2</sub><sup>-</sup>-free solution at -0.8 V, (3) electrolysis in NO<sub>2</sub><sup>-</sup>-containing solution at open-circuit potential (OCP), (4) before electrolysis.

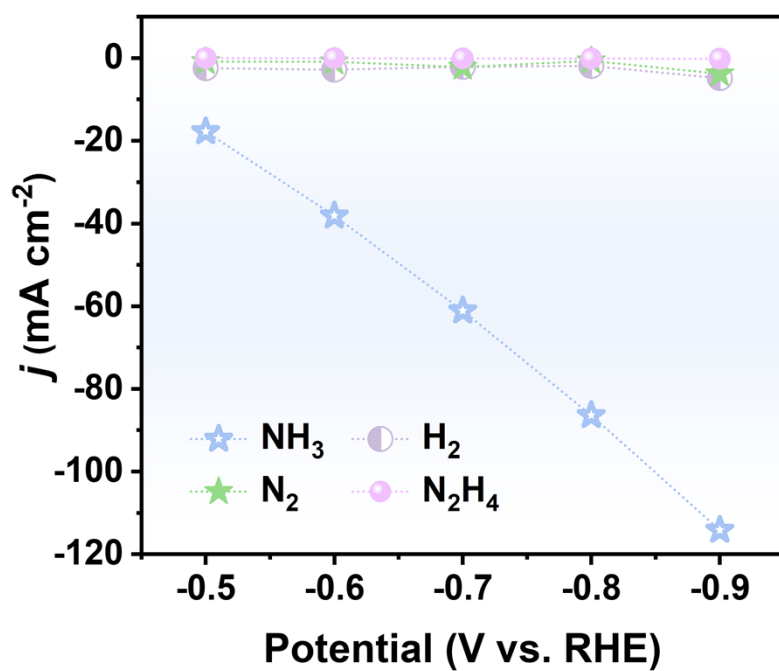

Fig. S4. Partial current densities of various products over L-Pd after 0.5 h of NO<sub>2</sub>RR electrolysis at different potentials.



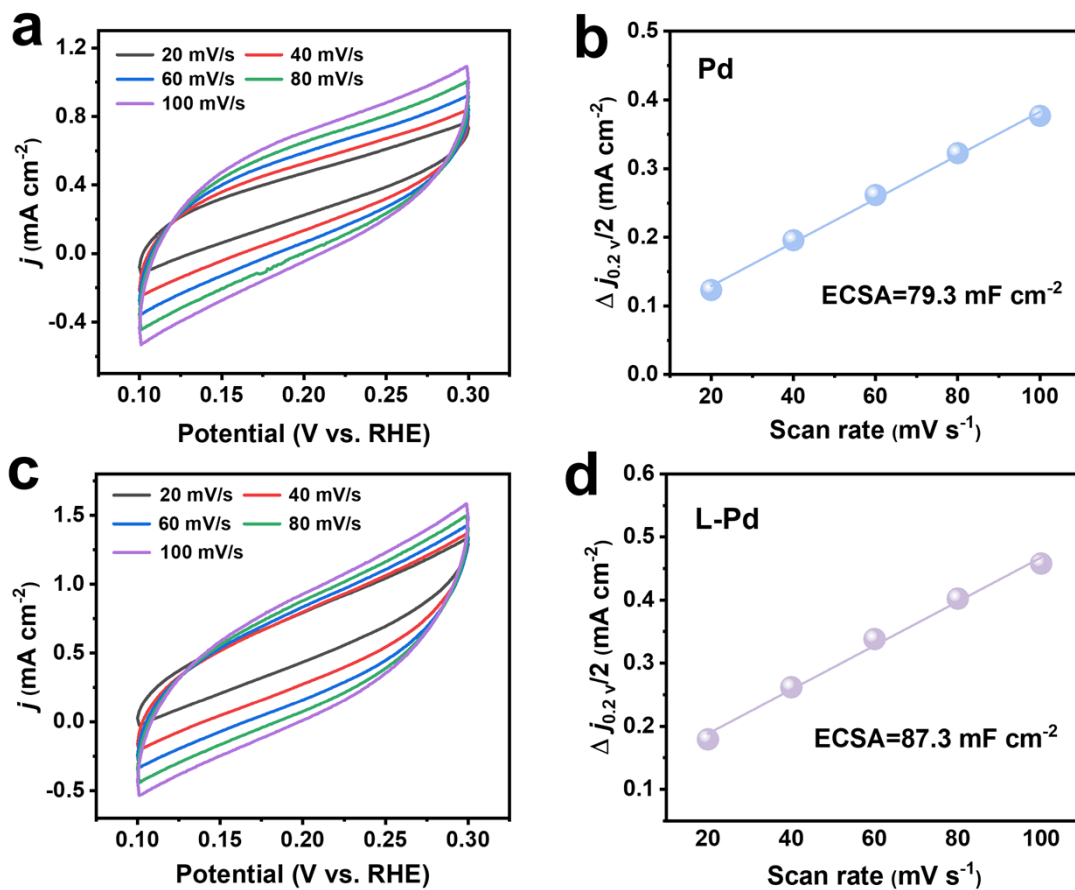

Fig. S5. CV measurements in 0.5 M  $\text{Na}_2\text{SO}_4$  electrolyte at different scanning rates for (a, b) Pd and (c, d) L-Pd, and corresponding calculated ECSA.

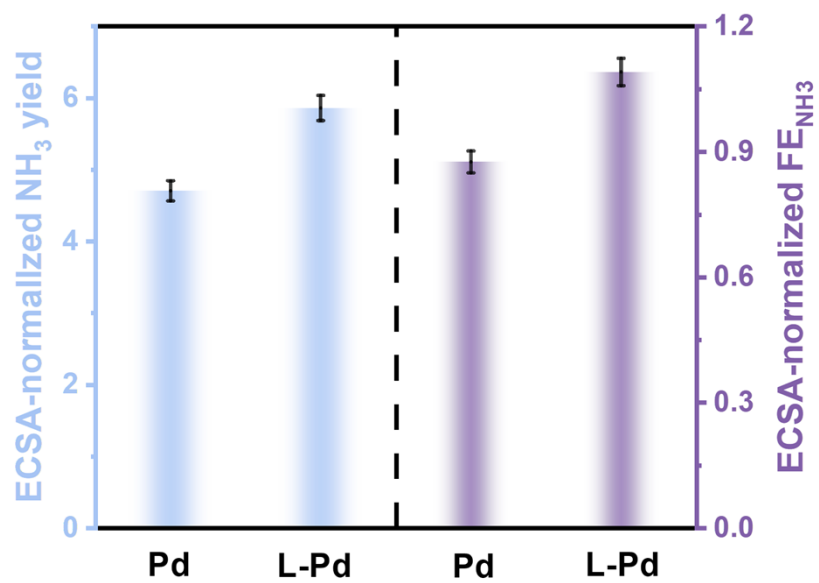

Fig. S6. Comparison of the ECSA-normalized NH<sub>3</sub> yield rates and FE<sub>NH3</sub> between Pd and L-Pd at -0.8 V.

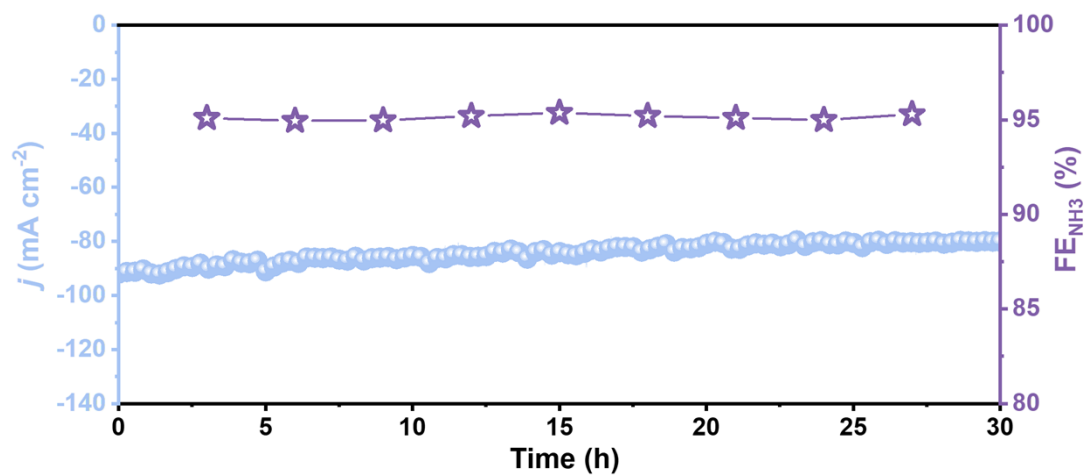

Fig. S7. Long-term chronoamperometry test of L-Pd at -0.8 V.

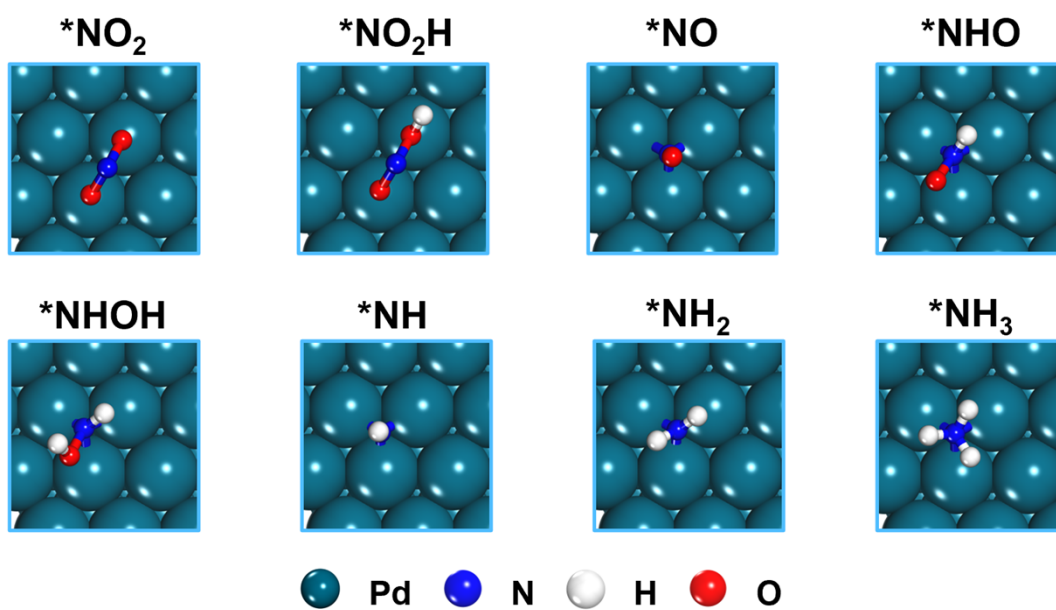

Fig. S8. Optimized atomic configurations of the NO<sub>2</sub>RR reaction intermediates on Pd.

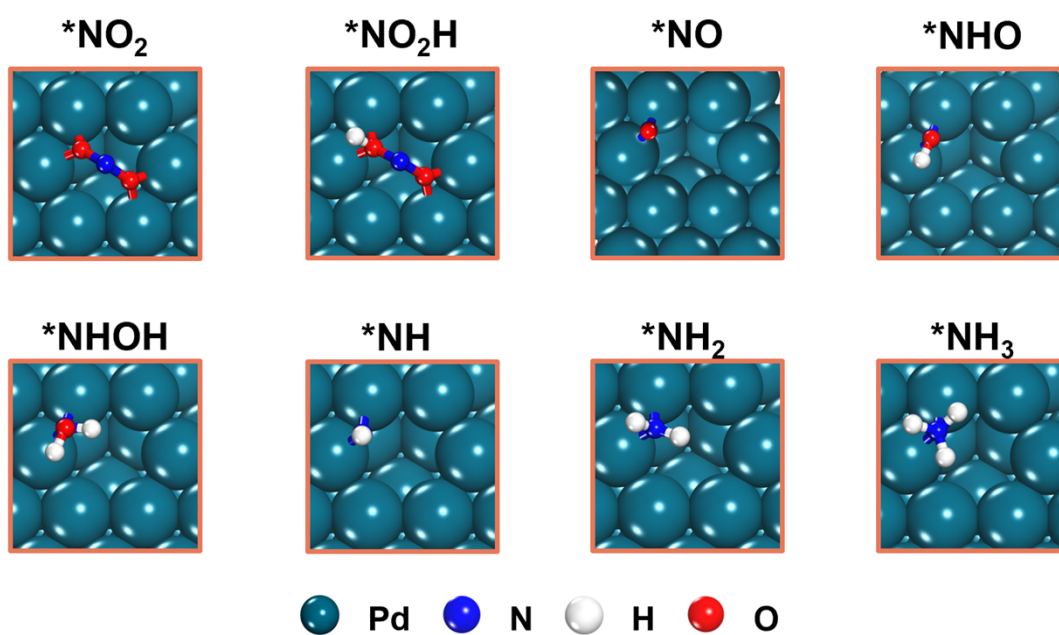

Fig. S9. Optimized atomic configurations of the  $NO_2RR$  reaction intermediates on L-Pd.

Table S1. Comparison of the optimum NH<sub>3</sub> yield rate and NH<sub>3</sub>-Faradic efficiency (FE<sub>NH<sub>3</sub></sub>) for the recently reported NO<sub>2</sub>RR electrocatalysts at ambient conditions

| Catalyst                               | Electrolyte                                                                   | NH <sub>3</sub> yield rate (mg h <sup>-1</sup> cm <sup>-2</sup> ) | FE <sub>NH<sub>3</sub></sub> | Reference |
|----------------------------------------|-------------------------------------------------------------------------------|-------------------------------------------------------------------|------------------------------|-----------|
| P-TiO <sub>2</sub> /TP                 | 0.1 M Na <sub>2</sub> SO <sub>4</sub> (0.1 M NO <sub>2</sub> <sup>-</sup> )   | 560.8                                                             | 90.6% @ -0.6 V               | [4]       |
| CoB@TiO <sub>2</sub> /TP               | 0.1 M Na <sub>2</sub> SO <sub>4</sub> (400 ppm NO <sub>2</sub> <sup>-</sup> ) | 233.1                                                             | 95.2% @ -0.7 V               | [5]       |
| Ag@NiO/CC                              | 0.1 M NaOH (0.1 M NO <sub>2</sub> <sup>-</sup> )                              | 338.3                                                             | 96.1% @ -0.7 V               | [6]       |
| Ni <sub>2</sub> P/NF                   | 0.1 M PBS (200 ppm NO <sub>2</sub> <sup>-</sup> )                             | 191.3                                                             | 90.2±3.0% @ -0.3 V           | [7]       |
| CF@Cu <sub>2</sub> O                   | 0.1 M PBS (0.1 M NO <sub>2</sub> <sup>-</sup> )                               | 441.8                                                             | 94.2% @ -0.6 V               | [8]       |
| V-TiO <sub>2</sub> /TP                 | 0.1 M NaOH (0.1 M NO <sub>2</sub> <sup>-</sup> )                              | 540.8                                                             | 93.2% @ -0.6 V               | [9]       |
| CoP NA/TM                              | 0.1 M PBS (500 ppm NO <sub>2</sub> <sup>-</sup> )                             | 132.7±3.0                                                         | 90±2.3% @ -0.2 V             | [10]      |
| Ni-TiO <sub>2</sub> /TP                | 0.1 M NaOH (0.1 M NO <sub>2</sub> <sup>-</sup> )                              | 380.27                                                            | 94.89% @ -0.5 V              | [11]      |
| NiS <sub>2</sub> @TiO <sub>2</sub> /TM | 0.1 M NaOH (0.1 M NO <sub>2</sub> <sup>-</sup> )                              | 485.4                                                             | 92.1% @ -0.5 V               | [12]      |
| L-Pd                                   | 0.5 M Na <sub>2</sub> SO <sub>4</sub> (0.1 M NO <sub>2</sub> <sup>-</sup> )   | 511.5                                                             | 95.2% @ -0.8 V               | This work |

## References

- [1]. D. Zhu, L. Zhang, R. E. Ruther and R. J. Hamers, *Nat. Mater.*, 2013, **12**, 836-841.
- [2]. G. W. Watt and J. D. Chrisp, *Anal. Chem.*, 1952, **24**, 2006-2008.
- [3]. X. Li, P. Shen, Y. Luo, Y. Li, Y. Guo, H. Zhang and K. Chu, *Angew. Chem. Int. Edit.*, 2022, **134**, e202205923.
- [4]. L. Ouyang, X. He, S. Sun, Y. Luo, D. Zheng, J. Chen, Y. Li, Y. Lin, Q. Liu, A. M. Asiri and X. Sun, *J. Mater. Chem. A*, 2022, **10**, 23494-23498.
- [5]. L. Hu, D. Zhao, C. Liu, Y. Liang, D. Zheng, S. Sun, Q. Li, Q. Liu, Y. Luo, Y. Liao, L. Xie and X. Sun, *Inorg. Chem. Front.*, 2022, **9**, 6075-6079.
- [6]. Q. Liu, G. Wen, D. Zhao, L. Xie, S. Sun, L. Zhang, Y. Luo, A. Ali Alshehri, M. S. Hamdy, Q. Kong and X. Sun, *J. Colloid Interf. Sci.*, 2022, **623**, 513-519.
- [7]. G. Wen, J. Liang, L. Zhang, T. Li, Q. Liu, X. An, X. Shi, Y. Liu, S. Gao, A. M. Asiri, Y. Luo, Q. Kong and X. Sun, *J. Colloid Interf. Sci.*, 2022, **606**, 1055-1063.
- [8]. Q. Chen, X. An, Q. Liu, X. Wu, L. Xie, J. Zhang, W. Yao, M. S. Hamdy, Q. Kong and X. Sun, *Chem. Commun.*, 2022, **58**, 517-520.
- [9]. H. Wang, F. Zhang, M. Jin, D. Zhao, X. Fan, Z. Li, Y. Luo, D. Zheng, T. Li, Y. Wang, B. Ying, S. Sun, Q. Liu, X. Liu and X. Sun, *Mater. Today Phys.*, 2023, **30**, 100944.
- [10]. G. Wen, J. Liang, Q. Liu, T. Li, X. An, F. Zhang, A. A. Alshehri, K. A. Alzahrani, Y. Luo, Q.

- Kong and X. Sun, *Nano Res.*, 2022, **15**, 972-977.
- [11]. Z. Cai, C. Ma, D. Zhao, X. Fan, R. Li, L. Zhang, J. Li, X. He, Y. Luo, D. Zheng, Y. Wang, B. Ying, S. Sun, J. Xu, Q. Lu and X. Sun, *Mater. Today Energy*, 2023, **31**, 101220.
- [12]. X. He, L. Hu, L. Xie, Z. Li, J. Chen, X. Li, J. Li, L. Zhang, X. Fang, D. Zheng, S. Sun, J. Zhang, A. Ali Alshehri, Y. Luo, Q. Liu, Y. Wang and X. Sun, *J. Colloid Interface Sci.*, 2023, **634**, 86-92.
